# Supplementary material
Source: Springer Nature journal article supplement (https://www.springermedizin.de/resource/supplementary/12883_2009_314_MOESM2_ESM.pdf/9455134)

c 17  
LTFE/M  
11

H

P

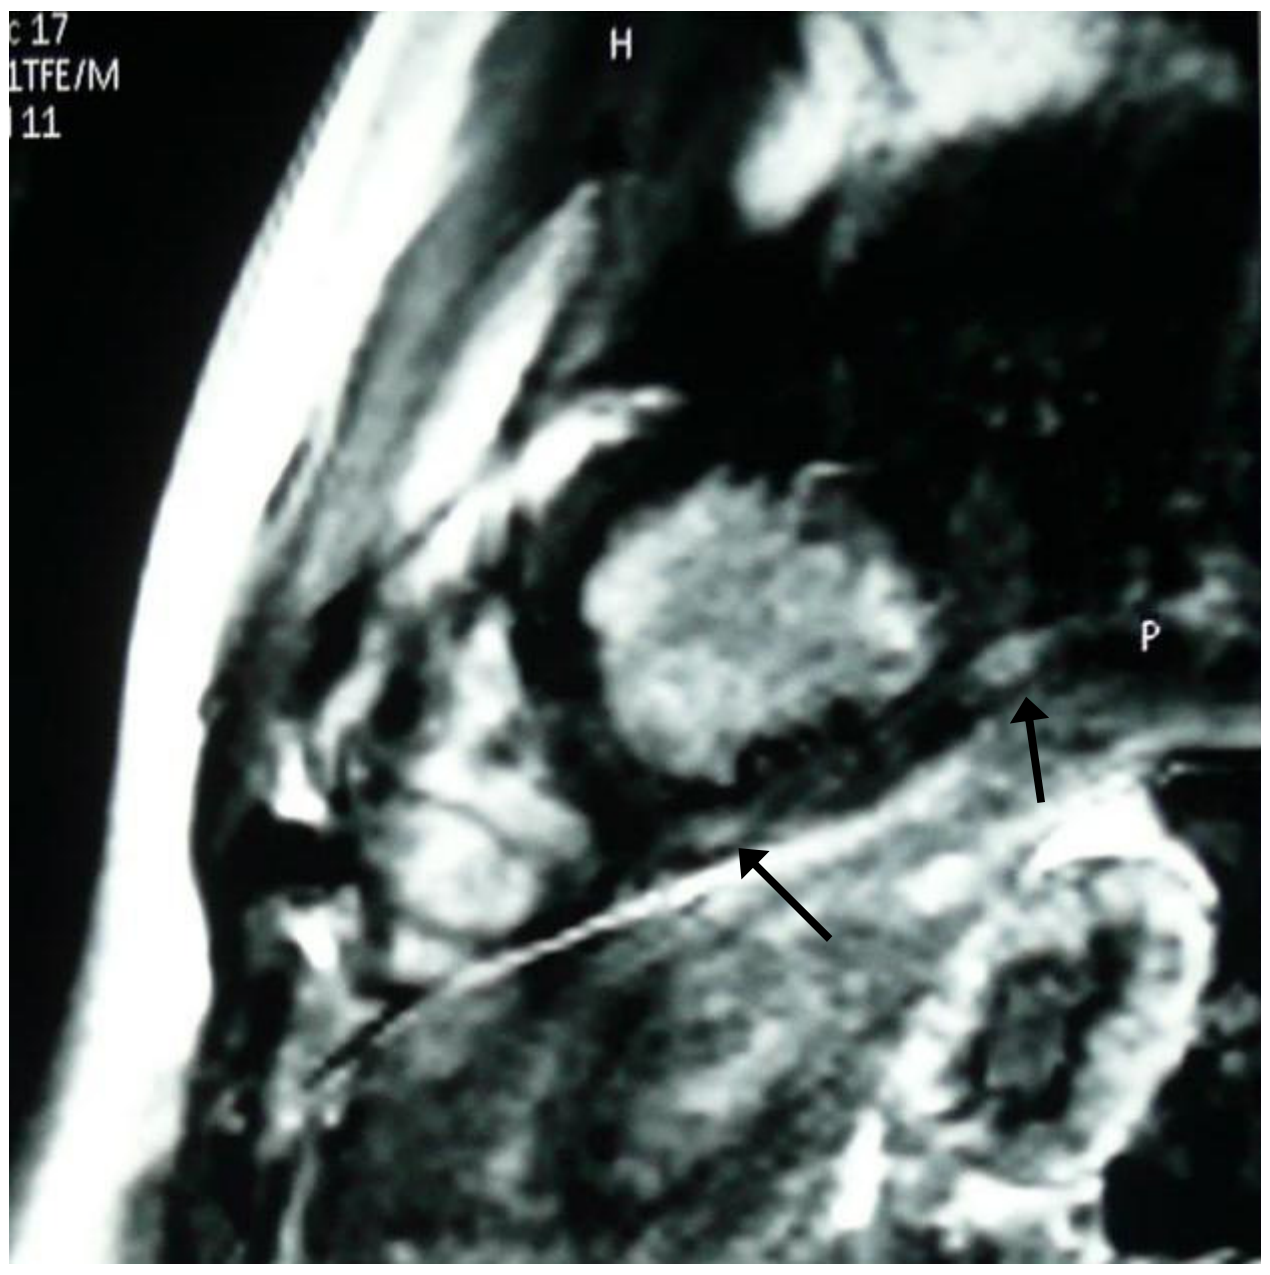

Supplement: MOESM2 [file 9455134]
